# Supplementary material
Source: MDPI journal article supplement (https://www.mdpi.com/1424-2818/13/4/171)
Supplement: s1 [file s1]

**Table S1.** Three major vegetation types of Poyang Lake according to Wan et al. (2018).

| <b>Vegetation Type</b> | <b>Dominant Species</b>                             |
|------------------------|-----------------------------------------------------|
| Reeds                  | <i>Phragmites communis</i>                          |
|                        | <i>Miscanthus sacchariflorus</i>                    |
|                        | <i>Artemisia selengensis</i>                        |
| Sedges                 | <i>Artemisia rubripes</i>                           |
|                        | <i>Polygonum caespitosum</i>                        |
|                        | <i>Zizania caduciflora</i>                          |
|                        | <i>Carex cinerascens</i>                            |
|                        | <i>Carex brevicuspis</i>                            |
|                        | <i>Carex scabrifolia</i>                            |
|                        | <i>Carex argyi.</i>                                 |
|                        | <i>Carex doniana</i>                                |
|                        | <i>Carex unisexualis</i>                            |
|                        | <i>C. laticeps</i>                                  |
| Aquatics               | <i>Phalaris arundinacea</i>                         |
|                        | <i>Polygonum orientale</i>                          |
|                        | <i>Polygonum japonicum</i>                          |
|                        | <i>Cardamine lyrata</i>                             |
|                        | <i>Potentilla limprichtii</i>                       |
|                        | <i>Vallisneria natans</i>                           |
|                        | <i>Potamogeton malaianus</i>                        |
|                        | <i>Potamogeton crispus</i>                          |
|                        | <i>Trapa maximowiczii</i>                           |
|                        | <i>Hydrilla verticillata</i> var. <i>rosburghii</i> |
|                        | <i>Najas minor</i>                                  |

**Table S2.** Details of the Landsat 8 image data used which was downloaded from USGS.

| <b>Satellite</b> | <b>Sensor</b> | <b>Path/Row</b> | <b>Acquisition Date</b>      | <b>Level of Processing</b> | <b>Resolution</b> | <b>Wavelength (μm)</b> |
|------------------|---------------|-----------------|------------------------------|----------------------------|-------------------|------------------------|
| Landsat 8        | OLI           | 121/40          | 2015-12-22<br>and 2019-02-23 | L1T                        | 30m               | Band 1:0.435–0.453     |
|                  |               |                 |                              |                            |                   | Band 2:0.452–0.4512    |
|                  |               |                 |                              |                            |                   | Band 3: 0.533–0.590    |
|                  |               |                 |                              |                            |                   | Band 4: 0.636–0.673    |
|                  |               |                 |                              |                            |                   | Band 5: 0.851–0.879    |
|                  |               |                 |                              |                            |                   | Band 6: 1.566–1.651    |
|                  |               |                 |                              |                            |                   | Band 7: 2.107–2.294    |
|                  |               |                 |                              |                            |                   | Band 9: 1.363–1.384    |

**Table S3.** The Criteria weights for herbivorous ANSERIFORMES habitat suitability determined using an AHP method.

| Criteria        | Pair Wise Comparison Matrix |       |     |    |    | Normalized Pair Wise Comparison Matrix |       |       |       |       | Weights<br>(a+b+c+d+e)/5 |
|-----------------|-----------------------------|-------|-----|----|----|----------------------------------------|-------|-------|-------|-------|--------------------------|
|                 | 1                           | 2     | 3   | 4  | 5  | 1(a)                                   | 2(b)  | 3(c)  | 4(d)  | 5(e)  |                          |
| (1) NDVI        | 1                           | 1     | 3   | 5  | 6  | 0.370                                  | 0.366 | 0.375 | 0.357 | 0.400 | 0.37                     |
| (2) Land cover  | 1                           | 1     | 3   | 5  | 5  | 0.370                                  | 0.366 | 0.375 | 0.357 | 0.333 | 0.36                     |
| (3) NDMI        | 1/3                         | 1/3   | 1   | 2  | 2  | 0.123                                  | 0.122 | 0.125 | 0.143 | 0.133 | 0.13                     |
| (4) Slope       | 1/5                         | 1/5   | 1/5 | 1  | 1  | 0.074                                  | 0.073 | 0.063 | 0.071 | 0.067 | 0.07                     |
| (5) Disturbance | 1/6                         | 1/5   | 1/5 | 1  | 1  | 0.062                                  | 0.073 | 0.027 | 0.071 | 0.067 | 0.06                     |
| Total           | 2.7                         | 2.733 | 7.4 | 14 | 15 | 1                                      | 1     | 1     | 1     | 1     | 1                        |

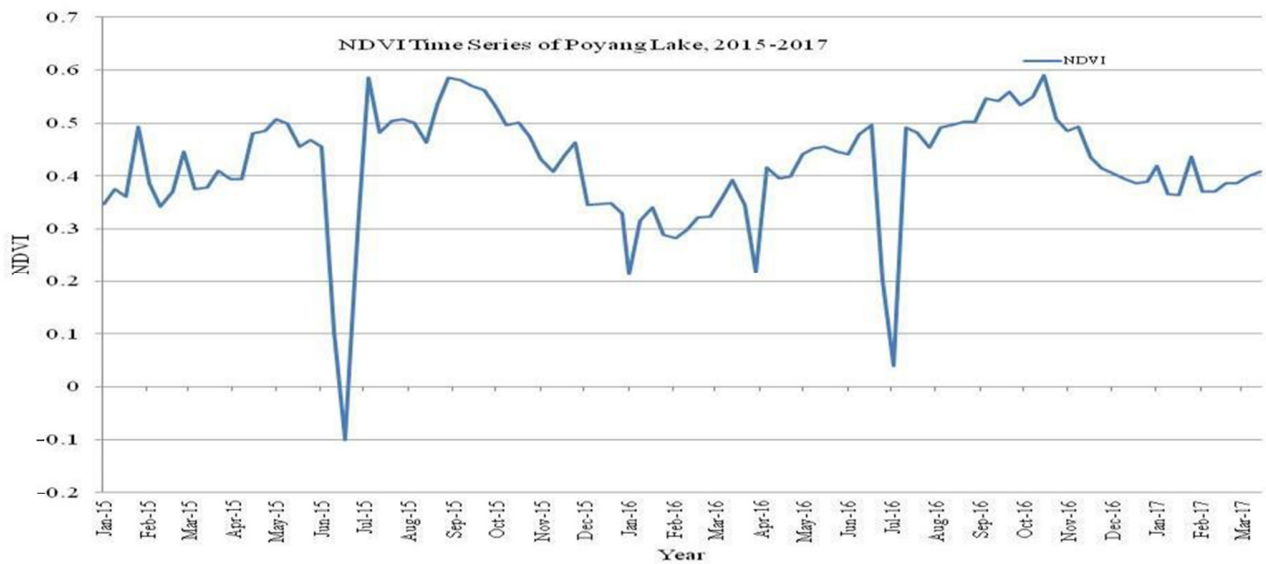

**Figure S1.** NDVI time series (2015–2017) derived from MODIS imagery obtained from Google Earth Engine.
